# Supplementary material
Source: publisher site journal article supplement (http://kjim.org/upload/media/kjim-2019-308-suppl4.pdf)
Supplement: Supplementary file 1 [file kjim-2019-308-suppl4.pdf]

**Supplementary Table 4. ORs for the primary composite outcome and re-admission/emergency room visit by logistic regression analysis**

| Variable                   | OR        | 95% CI    | p value |
|----------------------------|-----------|-----------|---------|
| Age                        | 1.00      | 0.98–1.01 | 0.664   |
| Female sex                 | 0.95      | 0.69–1.30 | 0.752   |
| History of CHD             | 1.81      | 1.25–2.62 | 0.002   |
| Smoking                    | 1.00      | 0.71–1.39 | 0.980   |
| Hypertension               | 1.03      | 0.77–1.38 | 0.855   |
| DM                         | 0.85      | 0.51–1.40 | 0.513   |
| Dyslipidemia               | 1.24      | 0.88–1.75 | 0.225   |
| Definite spasm             | 0.88      | 0.66–1.18 | 0.395   |
| Atherosclerosis $\geq$ 50% | 1.61      | 1.02–2.56 | 0.041   |
| Nitrates                   | 1.10      | 0.78–1.55 | 0.576   |
| Calcium channel blocker    |           |           |         |
| Diltiazem                  | Reference |           |         |
| Amlodipine                 | 0.93      | 0.60–1.46 | 0.759   |
| Nifedipine                 | 1.33      | 0.77–2.27 | 0.304   |
| Benidipine                 | 1.30      | 0.68–2.46 | 0.427   |

OR, odds ratio; CI, confidence interval; CHD, coronary heart disease; DM, diabetes mellitus.
